# Supplementary material
Source: publisher site journal article supplement (https://www.spandidos-publications.com/4331/downloadSupplementary)

Figure S1. Kaplan-Meier curves for overall survival following surgery. A total of 70 patients were examined. Patients were divided into the high and low expression groups according to the median value of miR-4730 expression in the tumor tissue divided by that in non-tumorous liver tissue. Non-tumorous tissue was collected from peritumoral liver tissue of patients with liver cancer. There was no significant difference in prognosis between the two groups ( $P=0.786$ ). T, tumor tissue; NT, non-tumor tissue.

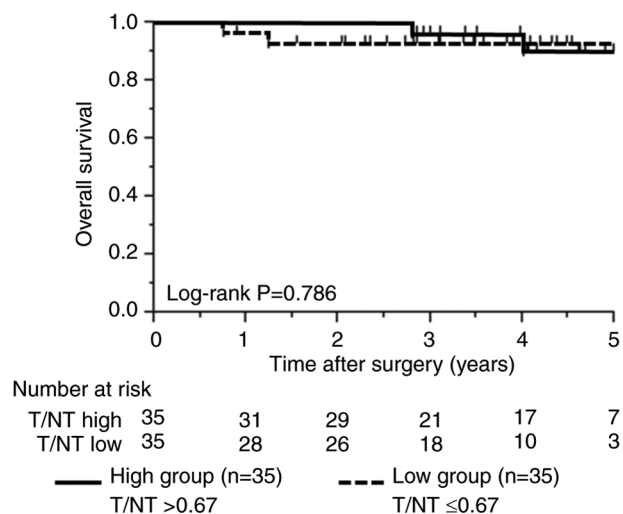

Figure S2. Correlation between HMGA1 and miR-4730 expression in formalin-fixed paraffin-embedded non-tumorous liver samples ( $P=0.646$  and  $\rho=-0.057$ , determined using Spearman's rank correlation coefficient). Patients without HMGA1 expression ( $n=3$ ) were excluded. HMGA1, high mobility group A1.

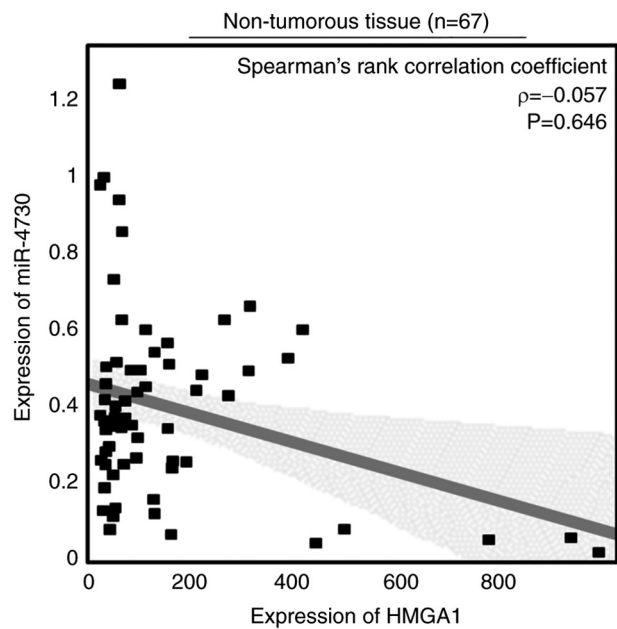

Supplement: Supplementary file 1 [file downloadSupplementary]
